# Supplementary material for: Lack of TRPM2 Impaired Insulin Secretion and Glucose Metabolisms in Mice
Source: PubMed Central journal article supplement — Diabetes. 2010 Oct 4;60(1):119–26. doi: 10.2337/db10-0276 (PMC3012163; doi:10.2337/db10-0276), 2010-10-04
Supplement: supp_db10-0276_db100276onlineappendix.pdf [file supp_db10-0276_db100276onlineappendix.pdf]

Supplementary FIG. 1 Oral glucose tolerance in female WT and TRPM2-KO mice.

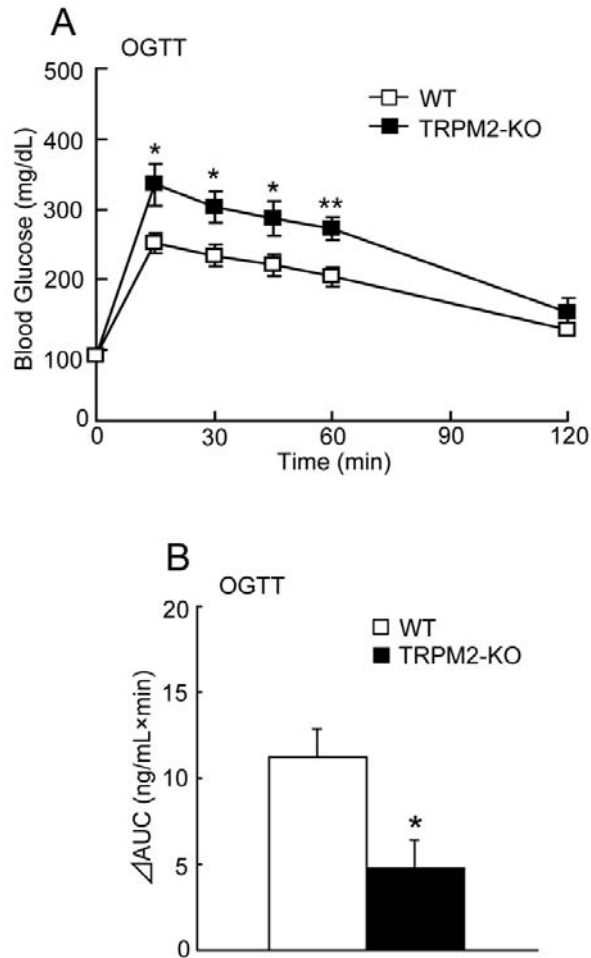

An oral glucose tolerance test (OGTT) was performed on female TRPM2-KO and WT mice fasted for 16-17 h. A 20% glucose solution (100  $\mu$ L/10 g BW) was administered at time zero. *A*, Ordinates: blood glucose concentrations. Abscissae: time after injection of glucose. Each point represents the mean  $\pm$  S.E.M. of 7-9 mice. White and black symbols indicate data from WT and TRPM2-KO mice, respectively. *B*, Ordinates: calculation of the area under the curve (AUC) for plasma insulin concentrations. Each bar represents the mean + S.E.M. of 7-9 mice. White and black bars indicate data from WT and TRPM2-KO mice, respectively. Statistical significance was assessed using Student's *t*-test, or RM ANOVA followed by Dunnett's post-hoc test. \*,  $P < 0.05$ , \*\*,  $P < 0.01$  for WT vs. TRPM2-KO mice.

**Supplementary FIG. 2 Insulin tolerance in WT and TRPM2-KO mice.**

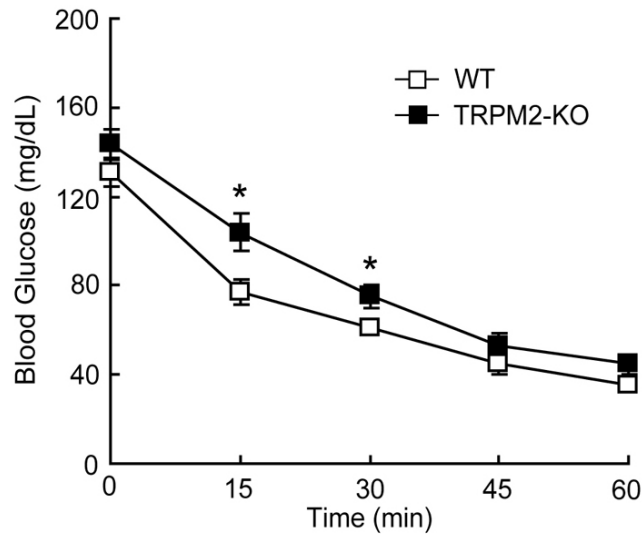

An intraperitoneal insulin tolerance test was performed in TRPM2-KO and WT mice fasted for 4 h. Porcine insulin (1 unit/kg BW) was injected at time zero. Ordinates: blood glucose concentrations. Abscissae: time after injection of insulin. Each point represents the mean  $\pm$  S.E.M. of 7-8 mice. White and black symbols indicate data from WT and TRPM2-KO, respectively. Statistical significance was assessed by RM ANOVA followed by Dunnett's post-hoc test. \*,  $P < 0.05$  for WT vs. TRPM2-KO mice.

**Supplementary FIG. 3 Heat-evoked currents in isolated pancreatic cells.**

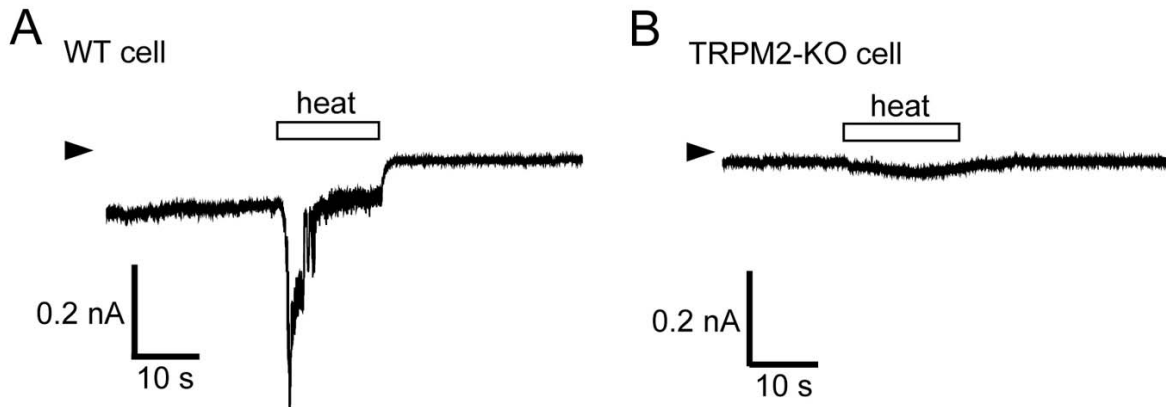

Representative heat-evoked inward currents at -60 mV with pipette solution containing 100  $\mu$ M cADPR in isolated pancreatic cells from WT (A) and TRPM2-KO (B) mice. Black arrow heads indicate 0 current levels. The initial apparent inward current prior to heat stimulation may indicate a cADPR-evoked current at room temperature. Three of the eight WT pancreatic cells showed similar inward currents. Those three cells are presumed to be  $\beta$ -cells. None of the TRPM2-KO pancreatic cells (0/6) responded to heat stimulation.

**Supplementary FIG. 4 Measurement of  $[Ca^{2+}]_i$  in  $\beta$ -cells isolated from WT and TRPM2-KO mice.**

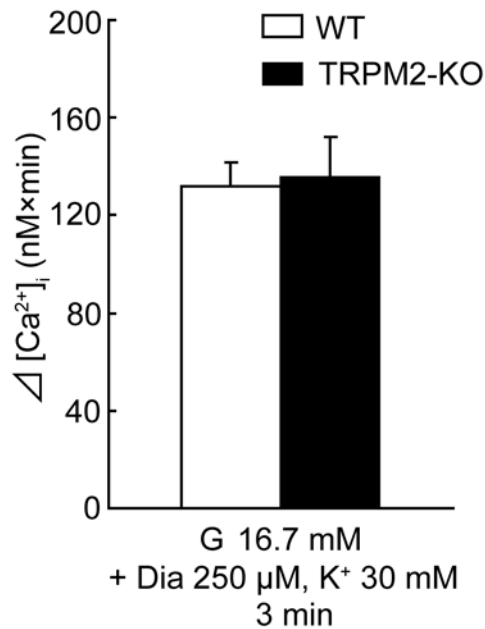

Quantification of  $[Ca^{2+}]_i$  changes in response to 16.7 mM glucose (G), 250  $\mu$ M dizoxide (Dia) and 30 mM K<sup>+</sup> for 3 min. Each bar represents the mean + S.E.M. White and black bars indicate data from WT and TRPM2-KO, respectively.

**Supplementary FIG. 5 Heat-evoked action potentials in isolated pancreatic cell from WT mice.**

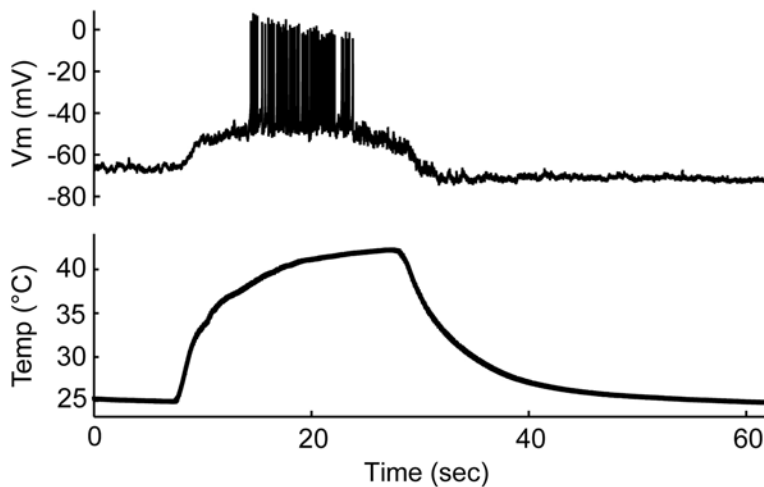

A representative heat-evoked depolarization of the membrane potential in a pancreatic cell. A lower panel indicates the bath temperature.
